# Supplementary material for: HNF1B nephropathy has a slow-progressive phenotype in childhood—with the exception of very early onset cases: results of the German Multicenter HNF1B Childhood Registry
Source: Springer Nature journal article supplement (doi:10.1007/s00467-018-4188-8), 2019-01-21
Supplement: MOESM2 [file 16408966]

# Follow-up study in patients with *HNF1B*- Nephropathy – follow-up

Date of examination:

Medical center:

Patient number:

Year of birth:

Body length:  cm

Body weight:  kg

## Current sonography:

|                                        | right kidney                                                                                                                                                                | left kidney                                                                                                                                                                 |
|----------------------------------------|-----------------------------------------------------------------------------------------------------------------------------------------------------------------------------|-----------------------------------------------------------------------------------------------------------------------------------------------------------------------------|
| Size<br>(length x width x depth in cm) | _____                                                                                                                                                                       | _____                                                                                                                                                                       |
| Echogenicity                           | <input type="checkbox"/> normal<br><input type="checkbox"/> increased                                                                                                       | <input type="checkbox"/> normal<br><input type="checkbox"/> increased                                                                                                       |
| Corticomedullary<br>differentiation    | <input type="checkbox"/> normal<br><input type="checkbox"/> reduced<br><input type="checkbox"/> lost                                                                        | <input type="checkbox"/> normal<br><input type="checkbox"/> reduced<br><input type="checkbox"/> lost                                                                        |
| Cysts                                  | <input type="checkbox"/> none<br><input type="checkbox"/> n ≤ 5<br><input type="checkbox"/> n > 5<br><input type="checkbox"/> d ≤ 10mm<br><input type="checkbox"/> d > 10mm | <input type="checkbox"/> none<br><input type="checkbox"/> n ≤ 5<br><input type="checkbox"/> n > 5<br><input type="checkbox"/> d ≤ 10mm<br><input type="checkbox"/> d > 10mm |

# Follow-up study in patients with *HNF1B*- Nephropathy – follow-up

## Laboratory investigations (Serum)

|                   |                      |                          |                      |                   |
|-------------------|----------------------|--------------------------|----------------------|-------------------|
| Creatinine        | <input type="text"/> | $\mu\text{mol/l}$ or     | <input type="text"/> | $\text{mg/dl}$    |
| Uric acid         | <input type="text"/> | $\mu\text{mol/l}$ or     | <input type="text"/> | $\text{mg/dl}$    |
| GOT               | <input type="text"/> | U/l                      |                      |                   |
| GPT               | <input type="text"/> | U/l                      |                      |                   |
| $\gamma$ -GT      | <input type="text"/> | U/l                      |                      |                   |
| AP                | <input type="text"/> | U/l                      |                      |                   |
| Bilirubin (total) | <input type="text"/> | $\text{mg/dl}$ or        | <input type="text"/> | $\mu\text{mol/l}$ |
| Magnesium         | <input type="text"/> | $\text{mmol/l}$          |                      |                   |
| Calcium           | <input type="text"/> | $\text{mmol/l}$          |                      |                   |
| Total protein     | <input type="text"/> | $\text{g/dl}$            |                      |                   |
| Albumin           | <input type="text"/> | $\text{g/dl}$            |                      |                   |
| Blood glucose     | <input type="text"/> | $\text{mg/dl}$ (fasting) |                      |                   |
| HbA1c             | <input type="text"/> | %                        |                      |                   |

## Laboratory investigation (Urine)

|               |                      |                      |                      |                |
|---------------|----------------------|----------------------|----------------------|----------------|
| Creatinine    | <input type="text"/> | $\mu\text{mol/l}$ or | <input type="text"/> | $\text{mg/dl}$ |
| Uric acid     | <input type="text"/> | $\mu\text{mol/l}$    |                      |                |
| Magnesium     | <input type="text"/> | $\text{mmol/l}$      |                      |                |
| Calcium       | <input type="text"/> | $\text{mmol/l}$      |                      |                |
| Total protein | <input type="text"/> | $\text{mg/dl}$ and   | <input type="text"/> | $\text{g/day}$ |
| Albumin       | <input type="text"/> | $\text{mg/dl}$       |                      |                |

# Follow-up study in patients with *HNF1B*- Nephropathy – follow-up

## Extrarenal symptoms

|                                 |                             |                              |                     |
|---------------------------------|-----------------------------|------------------------------|---------------------|
| MODY type 5                     | no <input type="checkbox"/> | yes <input type="checkbox"/> | manifestation _____ |
| Hyperuricaemia                  | no <input type="checkbox"/> | yes <input type="checkbox"/> | manifestation _____ |
| Elevated liver enzymes          | no <input type="checkbox"/> | yes <input type="checkbox"/> | manifestation _____ |
| Exocrine pancreas insufficiency | no <input type="checkbox"/> | yes <input type="checkbox"/> | manifestation _____ |
| Others                          | _____                       |                              |                     |

## Further comments/longitudinal observations
