# Supplementary material for: HNF1B nephropathy has a slow-progressive phenotype in childhood—with the exception of very early onset cases: results of the German Multicenter HNF1B Childhood Registry
Source: Springer Nature journal article supplement (doi:10.1007/s00467-018-4188-8), 2019-01-21
Supplement: MOESM3 [file 16408966]

Supplement Table 1: Kidney dysplasia and renal cysts, depending on the type of *HNF1B* mutation

| <b>Mutation</b>                     | <b>Cyts<br/>(unilateral)</b> | <b>Cysts<br/>(bilateral)</b> | <b>No cysts</b> | <b>Dysplasia<br/>(unilateral)</b> | <b>Dysplasia<br/>(bilateral)</b> | <b>No dysplasia</b> |
|-------------------------------------|------------------------------|------------------------------|-----------------|-----------------------------------|----------------------------------|---------------------|
| Deletion<br>(n=33)                  | 21% (7/33)                   | 70% (23/33)                  | 9%(3/33)        | 12% (4/33)                        | 85% (28/33)                      | 3%(1/33)            |
| Missense<br>(n=11)                  | 18% (2/11)                   | 82% (9/11)                   | 0%              | 18% (2/11)                        | 82% (9/11)                       | 0%                  |
| Splice/Gross<br>insertion<br>(n=11) | 9% (1/11)                    | 73% (8/11)                   | 18%(2/11)       | 0%                                | 91% (10/11)                      | 9%(1/11)            |
| Stop<br>(n=7)                       | 0%                           | 86%(6/7)                     | 14% (1/7)       | 0%                                | 100% (7/7)                       | 0%                  |

p-value > 0.05 between all groups with respect to the type of mutation
